# Supplementary material
Source: MDPI journal article supplement (https://www.mdpi.com/1999-4907/15/5/875)
Supplement: s1 [file s1]

## *Supplementary Material*

### **Fractionation characteristics of inorganic phosphorus in cold temperate forest soils: Associating mechanisms of soil aggregate protection and recovery periods after forest fire disturbance**

Bing Wang<sup>1,2</sup>, Ruihua Li<sup>3</sup>, Zihao Wang<sup>1</sup>, and Rula Sa<sup>1,2,\*</sup>

1. Forestry College, Inner Mongolia Agricultural University, Hohhot 010019, China;

2. Forest Ecosystem National Observation and Research Station of Greater Khingan Mountains in Inner Mongolia, Genhe 022350, China;

3. School of Ecology and Environment, Inner Mongolia University, 010021, Hohhot, China

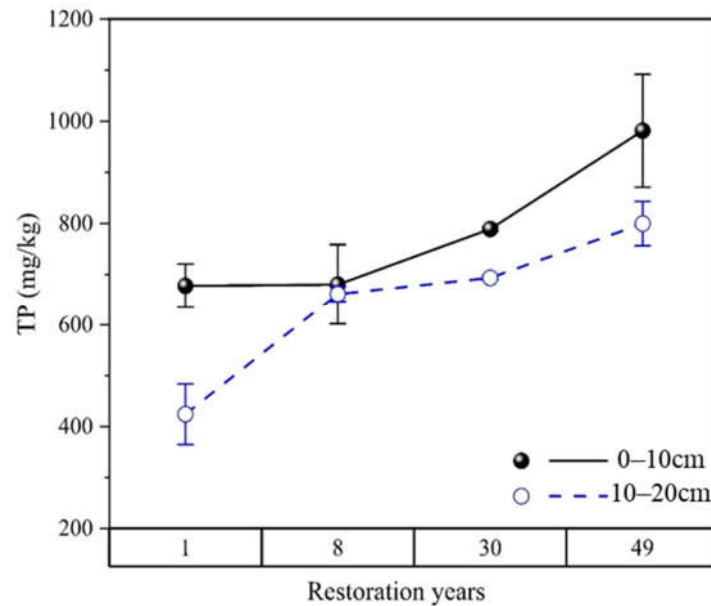

Figure S1 TP variation in bulk soils during different restoration periods.

Table S1. P fractions in bulk soils during different restoration years.

| Recovery periods (yrs) | Depth (cm) | Concentration of P fractions (mg/kg) |            |              |              |               |              |             |             |               |
|------------------------|------------|--------------------------------------|------------|--------------|--------------|---------------|--------------|-------------|-------------|---------------|
|                        |            | Active-P                             |            |              |              | Stable-P      |              |             |             |               |
|                        |            | Ex-P                                 | Al-P       | Fe-P         | Sum          | Oc-P          | ACa-P        | De-P        | Or-P        | Sum           |
| 1                      | 0–10       | 3.47±0.36                            | 2.94±0.37  | 246.01±40.19 | 252.43±40.19 | 171.91±3.60   | 183.19±17.55 | 25.49±0.93  | 44.71±0.49  | 425.30±20.71  |
|                        | 10–20      | 2.39±0.45                            | 3.01±2.30  | 74.10±23.75  | 79.50±25.60  | 87.90±10.60   | 172.77±37.84 | 51.91±1.79  | 32.09±11.83 | 344.67±58.48  |
| 8                      | 0–10       | 2.68±0.38                            | 11.43±3.79 | 177.28±12.45 | 191.38±16.62 | 141.15±20.83  | 204.52±71.51 | 48.55±8.27  | 94.61±6.22  | 488.83±94.39  |
|                        | 10–20      | 0.99±0.45                            | 10.53±1.72 | 142.67±6.94  | 154.19±8.21  | 124.56±15.67  | 213.17±13.06 | 81.95±16.04 | 87.73±15.44 | 507.41±29.33  |
| 30                     | 0–10       | 3.68±1.40                            | 3.85±0.99  | 169.90±30.00 | 177.42±27.62 | 308.70±29.46  | 152.95±31.11 | 83.04±23.66 | 67.08±8.88  | 611.78±34.19  |
|                        | 10–20      | 1.61±0.12                            | 1.92±0.59  | 133.46±19.95 | 136.98±19.23 | 230.35±17.61  | 185.32±9.95  | 100.15±5.49 | 40.71±11.81 | 556.53±24.96  |
| 49                     | 0–10       | 3.63±0.10                            | 7.96±1.03  | 371.71±24.45 | 383.30±25.38 | 332.21±130.01 | 160.86±7.77  | 18.16±1.86  | 86.94±10.52 | 598.16±130.90 |
|                        | 10–20      | 3.82±0.31                            | 4.44±1.66  | 294.89±43.44 | 303.15±45.41 | 264.22±19.60  | 159.67±7.42  | 31.67±12.78 | 56.03±2.64  | 511.59±37.16  |

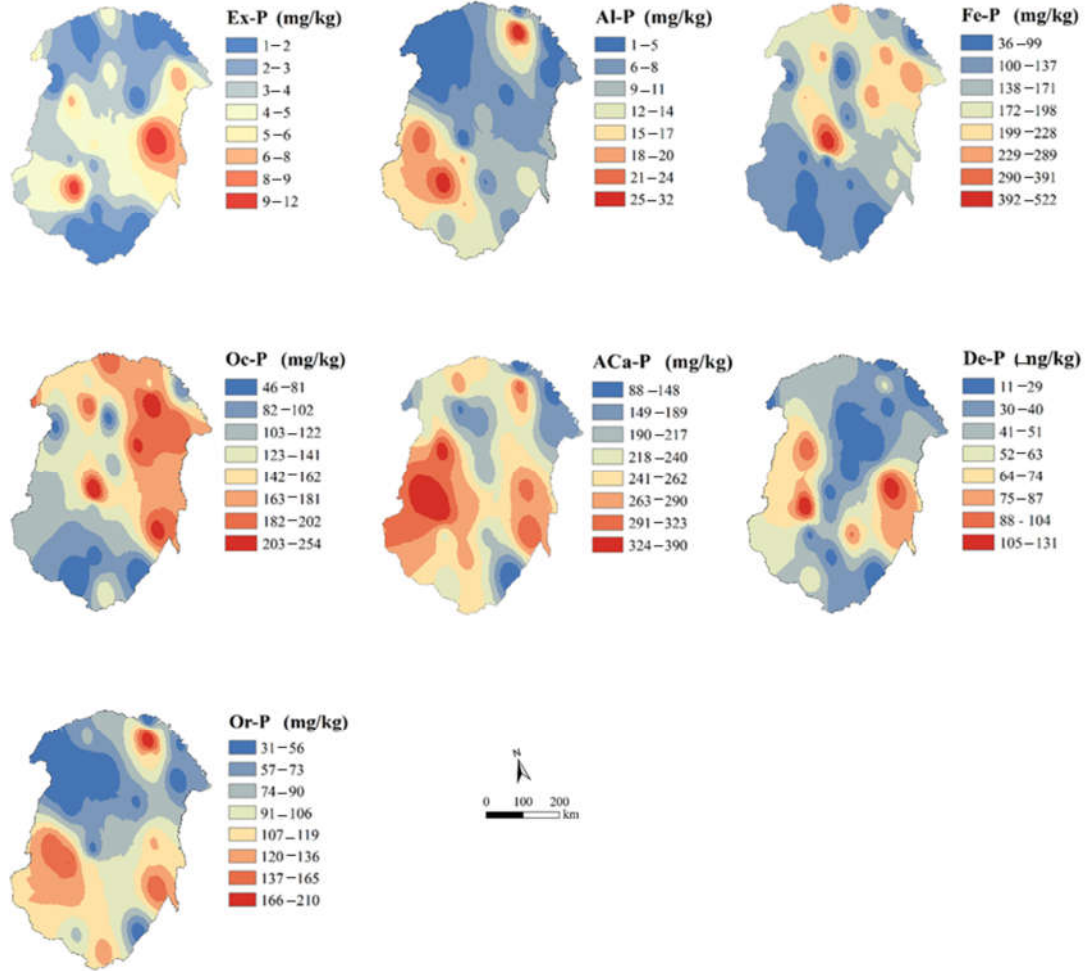

Figure S2 Spatial patterns of various P fractions in bulk soils.

Table S2. Distribution of TP in soil aggregates during different restoration years.

| Recovery<br>periods<br>(yrs) | Depth<br>(cm) | Concentration of TP (mg/kg) |          |        |        |         |        |        |         |        |
|------------------------------|---------------|-----------------------------|----------|--------|--------|---------|--------|--------|---------|--------|
|                              |               | >250μm                      | 53–250μm |        |        |         |        | <53μm  |         |        |
|                              |               | cPOM                        | LF       | iPOM   | μSilt  | μClay   | Sum    | dSilt  | dClay   | Sum    |
| 1                            | 0–10          | 648.97                      | 1025.89  | 556.77 | 346.61 | 3103.05 | 752.19 | 642.32 | 1637.79 | 649.51 |
|                              | 10–20         | 392.99                      | 810.31   | 320.78 | 282.18 | 2629.37 | 504.94 | 391.60 | 974.10  | 398.53 |
| 8                            | 0–10          | 645.39                      | 1042.64  | 448.33 | 507.66 | 1907.28 | 710.28 | 727.84 | 1361.67 | 736.54 |
|                              | 10–20         | 626.22                      | 651.55   | 586.12 | 529.08 | 1426.53 | 601.29 | 795.71 | 936.80  | 796.93 |
| 30                           | 0–10          | 1022.55                     | 718.34   | 288.12 | 320.05 | 1953.65 | 491.00 | 544.78 | 3921.40 | 561.82 |
|                              | 10–20         | 1089.17                     | 823.69   | 430.56 | 433.59 | 1875.20 | 555.69 | 589.44 | 1242.04 | 600.16 |
| 49                           | 0–10          | 1021.09                     | 1057.60  | 756.81 | 461.14 | 2290.33 | 870.65 | 936.49 | 1177.80 | 946.13 |
|                              | 10–20         | 842.13                      | 751.07   | 692.29 | 438.60 | 2134.11 | 775.20 | 804.83 | 1422.54 | 816.13 |

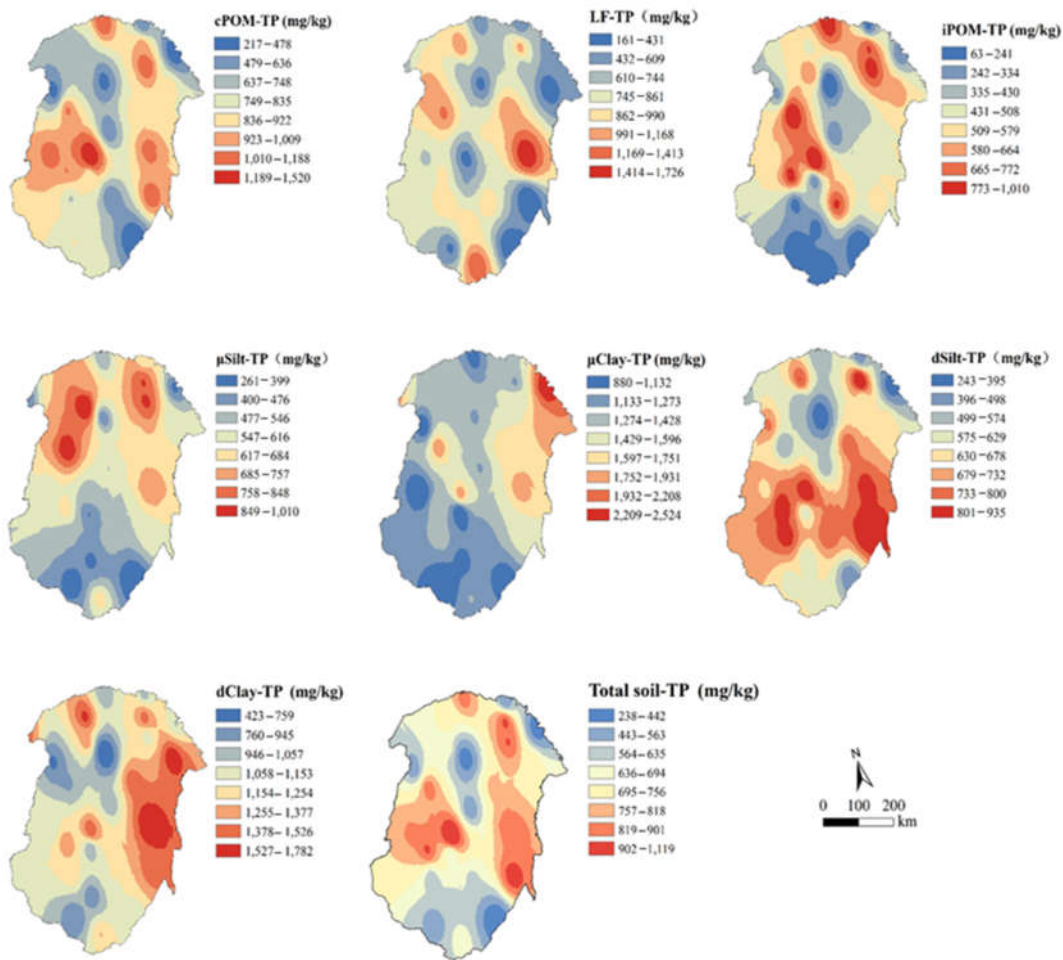

Figure S3. Spatial patterns of TP in soil aggregates.
